# Supplementary material for: LRP16 Integrates into NF-κB Transcriptional Complex and Is Required for Its Functional Activation
Source: PubMed Central journal article supplement (PMC3069058; doi:10.1371/journal.pone.0018157), 2011-03-31

**Figure S5**

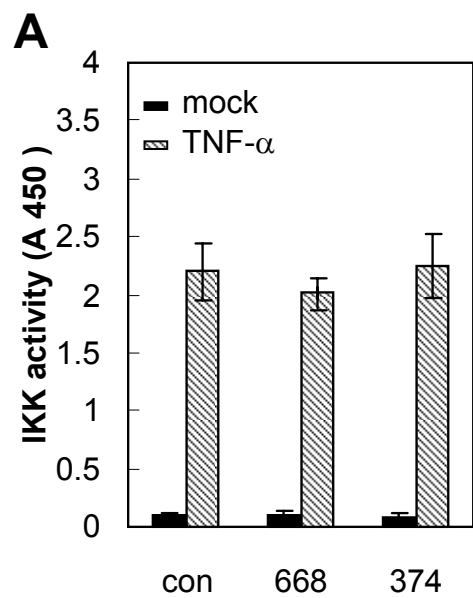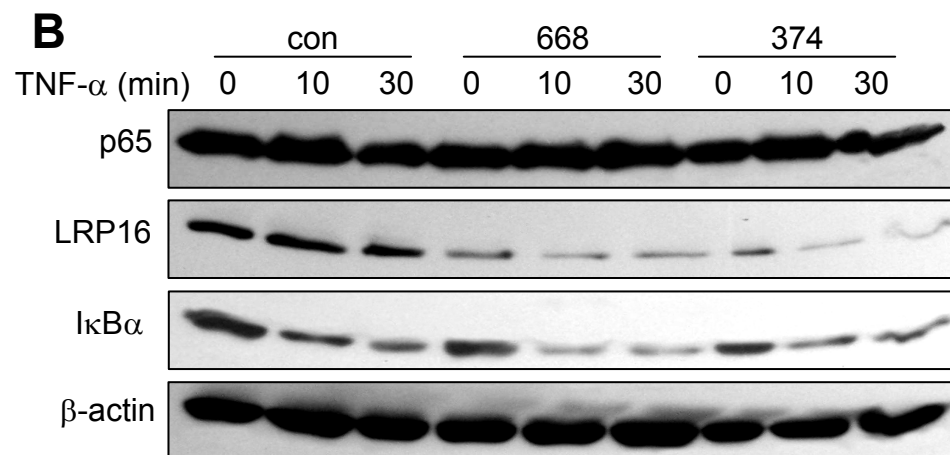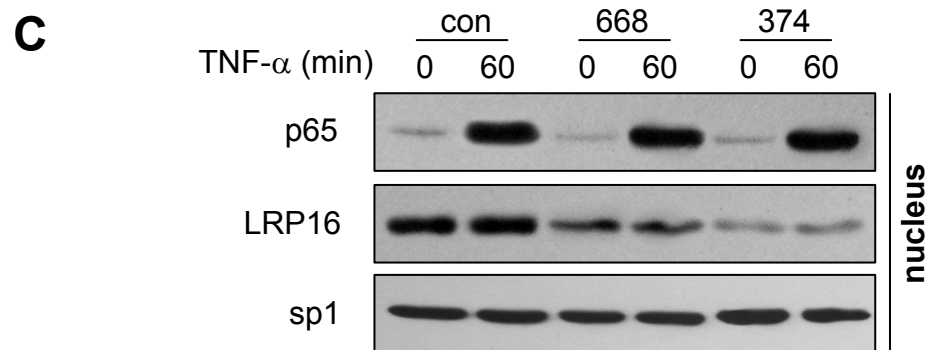

Supplement: pone.0018157.s005.pdf [file pone.0018157.s005.pdf]
